# Supplementary material for: Effects of Grape Polyphenols on the Life Span and Neuroinflammatory Alterations Related to Neurodegenerative Parkinson Disease-Like Disturbances in Mice
Source: PubMed Central journal article supplement (PMC7696792; doi:10.3390/molecules25225339), 2020-11-16
Supplement: molecules-25-05339-s001.pdf [file molecules-25-05339-s001.pdf]

## Supplementary Materials

**Table S1.** Content (mg/L) of active polyphenols in grape concentrate enoant (GPC) and dry wine material (DWM) from *Vitis vinifera* L. cv. "Cabernet Sauvignon" according to Zaitsev et al. (2010).

| Substance                                        | GPC     | DWM    |
|--------------------------------------------------|---------|--------|
| anthocyanins                                     |         |        |
| Delfinidin-3-O-glycoside                         | 27.1    | 2.3    |
| Cyanidin-3-O-glycoside                           | 12.3    | 8.2    |
| Peonidin-3-O-glycoside                           | 13.0    | 12.6   |
| Petunidin-3-O-glycoside                          | 1.2     | 0.8    |
| Malvidin-3-O-glycoside                           | 167.5   | 135.7  |
| Delfinidin-3-O-(6'-acetyl-glycoside)             | 12.4    | 9.4    |
| Cyanidin-3-O-(6'-acetyl-glycoside)               | 3.6     | 2.2    |
| Peonidin-3-O-(6'-acetyl-glycoside)               | 6.0     | 3.2    |
| Petunidin-3-O-(6'-acetyl-glycoside)              | 2.3     | 1.2    |
| Malvidin-3-O-(6'-acetyl-glycoside)               | 6.2     | 1.5    |
| Delfinidin-3-O-(6'-n-coumaroyl-glycoside)        | 2.8     | 1.0    |
| Petunidin-3-O-(6'-n-coumaroyl-glycoside)         | 6.5     | 1.6    |
| Malvidin-3-O-(6'-n-coumaroyl-glycoside)          | 1.9     | 0.5    |
| Flavones                                         |         |        |
| Quercetin                                        | 121.2   | 1.6    |
| Quercetin-3-O-glycoside                          | 46.0    | 3.9    |
| Flavan-3-ols                                     |         |        |
| (+)-D-catechin                                   | 879.0   | 64.2   |
| (-)-Epicatechin                                  | 567.0   | 32.1   |
| (-)-Epicatechin-gallate                          | 101.7   | 11.4   |
| Hydroxycinnamic acids                            |         |        |
| n-Coumaric acid                                  | 25.3    | 9.1    |
| Caffeic acid                                     | 29.0    | 5.6    |
| <i>Trans</i> -Coutaric acid                      | 42.6    | 4.2    |
| <i>Trans</i> -Caftaric acid                      | 78.9    | 24.5   |
| Hydroxybenzoic acids                             |         |        |
| Gallic acid                                      | 928.4   | 135.7  |
| Stilbenes                                        |         |        |
| <i>Trans</i> -Resveratrol                        | 5.6     | 0.5    |
| Oligomeric procyanidins                          |         |        |
| Procyanidin B1                                   | 1857.0  | 267.0  |
| Procyanidin B2                                   | 1325.0  | 155.0  |
| Procyanidin B3                                   | 421.0   | 58.0   |
| Procyanidin B5                                   | 269.0   | 45.0   |
| Procyanidin B7                                   | 128.0   | 15.0   |
| High-molecular weight and condensed procyanidins |         |        |
| Total polymeric polyphenols                      | 16370.0 | 2210.0 |

Zaitsev G.P., Catrich L.I., Ogai Yu.A. Biologically active polyphenols of the dry red 'Cabernet Sauvignon' wine material and the food concentrate 'Enoant'. *Vinogradarstvo i Vinodelie (Magarach)* 2010. 3: 25-27 (in Russian)

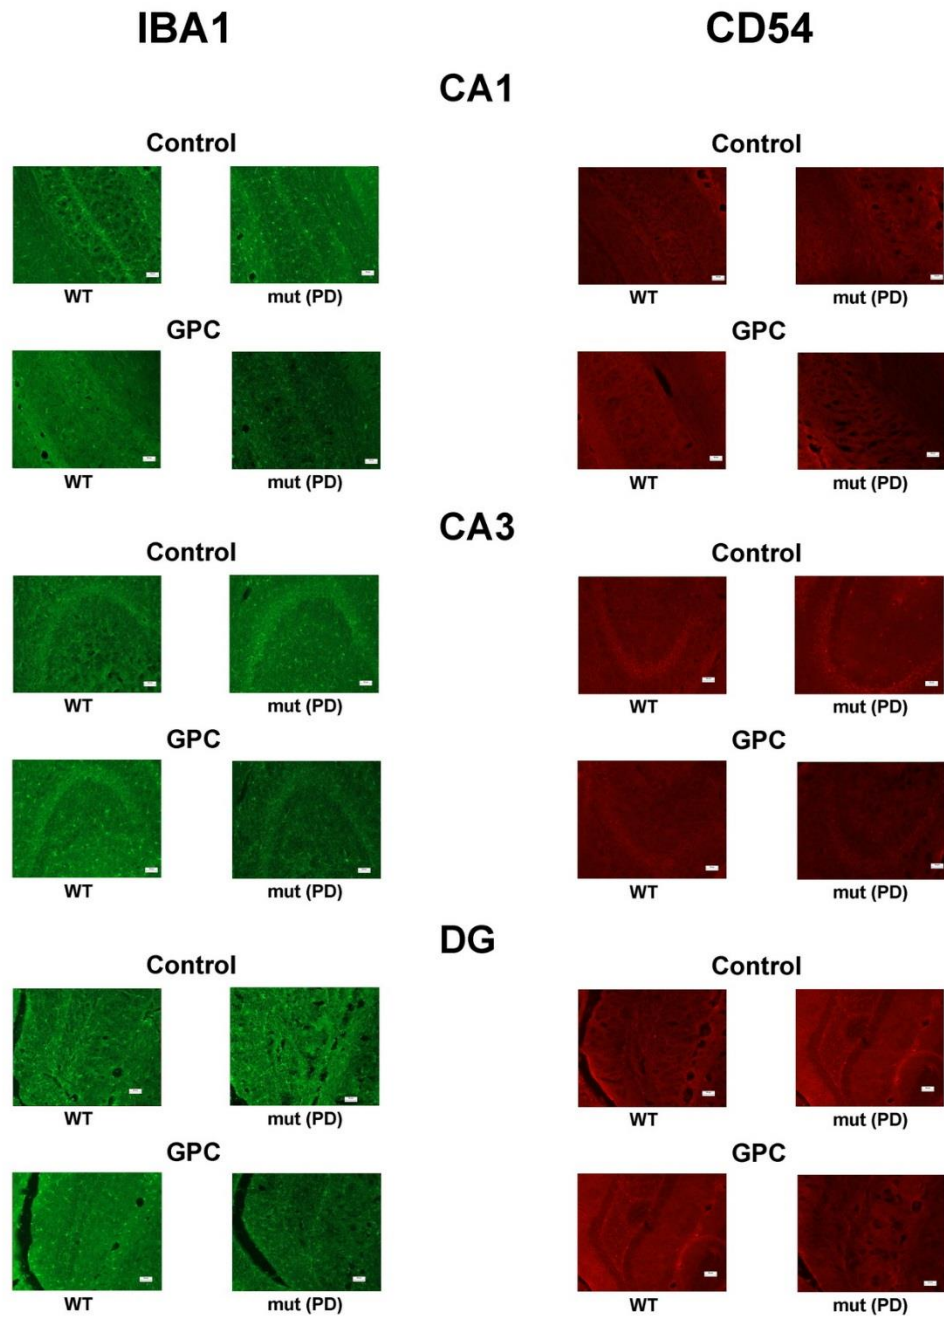

**Figure S1.** Effects of the overexpression of A53T-mutant  $\alpha$ -synuclein and diet supplementation with *GPC* for four months on the immunoreactivity against the microglial marker IBA1 or inflammatory marker CD54 in the hippocampal CA1 area, CA3 area, and dentate gyrus (DG) in mice. Magnification, 200 $\times$ ; bar, 50  $\mu$ m.
